# Supplementary material
Source: PubMed Central journal article supplement (PMC8059629)
Supplement: NIHMS1667828-supplement-2.pdf [file NIHMS1667828-supplement-2.pdf]

**Supplemental**

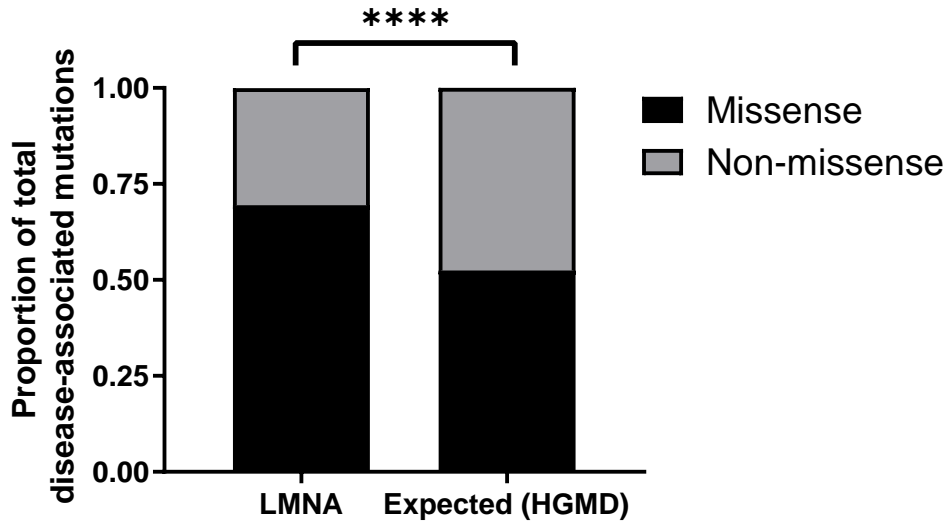

**Supplemental Figure 1.** Proportion of missense mutations in *LMNA* versus all known disease-associated mutations (Human Gene Mutation Database). *LMNA* vs. expected: Fisher’s exact test,  $p < 0.0001$ .

| Phenotype               |                | Geographic Origin |                |                  |                   |                  |                  |
|-------------------------|----------------|-------------------|----------------|------------------|-------------------|------------------|------------------|
|                         |                | Europe            | Africa         | Americas         | Oceania           | Asia             | Unknown          |
| Striated                | Myopathy       | 17 (35%)          | -              | 7 (15%)          | 3 (6%)            | 16 (33%)         | 5 (10%)          |
|                         | Cardiomyopathy | 282 (56%)         | 5 (1%)         | 78 (16%)         | -                 | 73 (15%)         | 62 (12%)         |
|                         | Both           | 254 (53%)         | 2 (<1%)        | 55 (12%)         | -                 | 61 (13%)         | 105 (22%)        |
|                         | Total          | 552 (54%)         | 7 (1%)         | 140 (14%)        | 3 (<1%)           | 150 (15%)        | 172 (17%)        |
| Lipodystrophy/Metabolic |                | 76 (24%)          | -              | 16 (5%)          | -                 | 20 (6%)          | 203 (64%)        |
| Neuropathy              |                | -                 | 44 (96%)       | 1 (2%)           | -                 | -                | 1 (2%)           |
| Progeria                |                | 22 (18%)          | 3 (2%)         | 31 (25%)         | -                 | 13 (11%)         | 54 (44%)         |
| Bone/Skin               |                | 14 (44%)          | 3 (9%)         | 4 (13%)          | -                 | 8 (25%)          | 3 (9%)           |
| Overlap                 |                | 56 (72%)          | 2 (3%)         | 13 (17%)         | 1 (1%)            | 3 (4%)           | 3 (4%)           |
| <b>Total</b>            |                | <b>721 (45%)</b>  | <b>59 (4%)</b> | <b>205 (13%)</b> | <b>4 (&lt;1%)</b> | <b>194 (12%)</b> | <b>436 (27%)</b> |

**Supplemental Table 2.** Reported patient geographic origin by phenotype.

**A**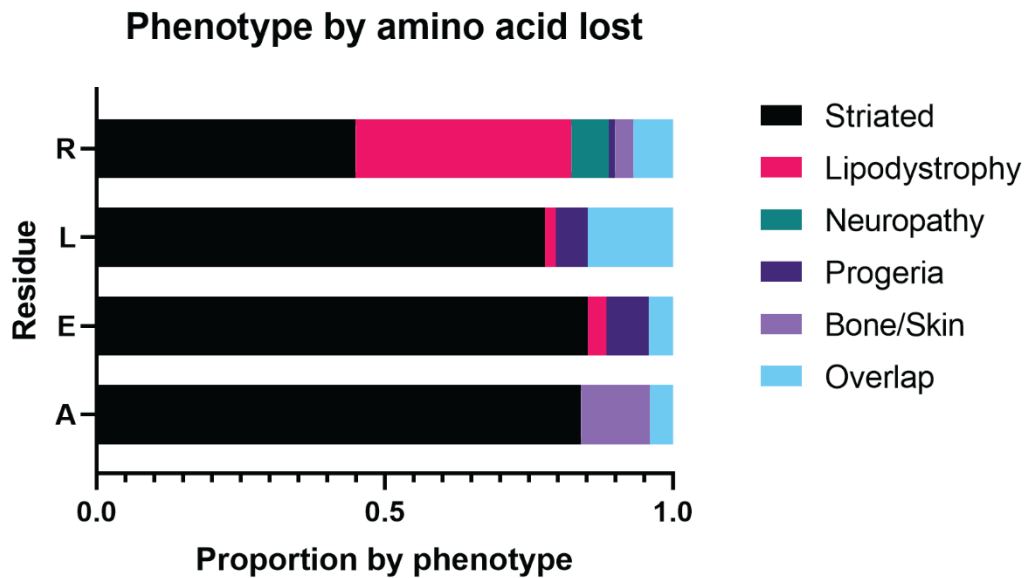**B**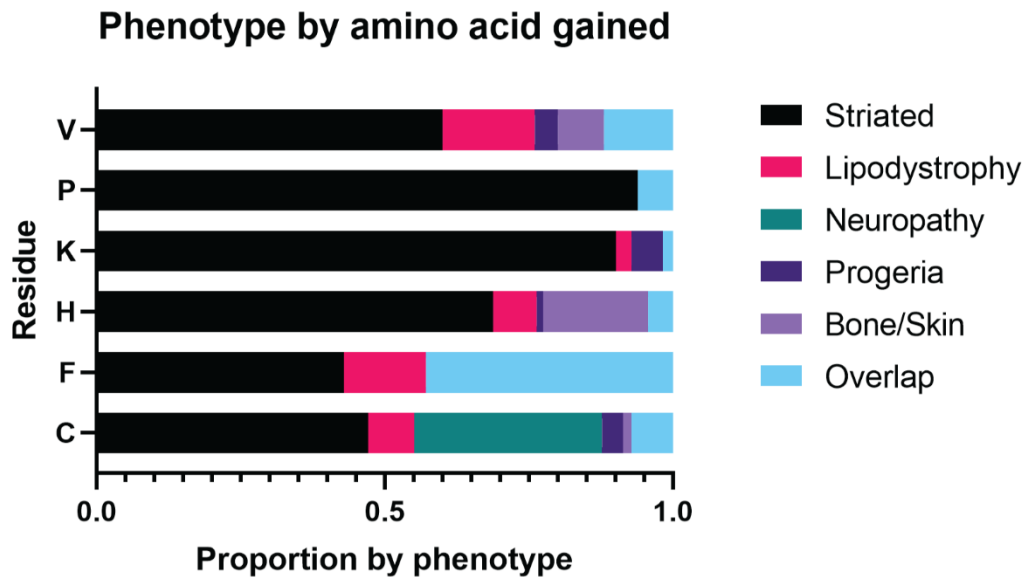

**Supplemental Figure 2. Phenotype sorted by amino acid change.** A) Phenotype by amino acid lost: the most commonly gained amino acid residues as a result of missense mutations charted by the phenotype observed. B) Phenotype by amino acid lost: the most commonly lost amino acid residues as a result of missense mutations charted by the phenotype observed.

| Phosphorylation change | Mutation        | Possible P-site | Possible Kinase (family) |
|------------------------|-----------------|-----------------|--------------------------|
| <b>Gain</b>            | L52P            | 51              | CDK, MAPK                |
|                        | A278P           | 277             | CDK, MAPK                |
|                        | L302P           | 301             | CDK, MAPK                |
|                        | Q396R           | 398             | PKA                      |
|                        | T528R           | 533             | (Akt)                    |
|                        | G635D           | (632, 652)      | CK2                      |
| <b>Loss</b>            | P4R             | 3               | MAPK, CDK                |
|                        | T10I            | 10              | PKA, PKC                 |
|                        | S22L            | 22              | CDK, MAPK                |
|                        | R48P            | 51              | PKC                      |
|                        | S277P           | 277             | PKA, PKC                 |
|                        | R298C           | 301             | PKC                      |
|                        | R388C           | 390             | PKA                      |
|                        | R388H           | 390             | PKA                      |
|                        | S395L           | 395             | PKC                      |
|                        | R401C           | 403, 404        | PKA, PKC                 |
|                        | R427G           | 429             | PKA                      |
|                        | D461Y           | 458             | CK2                      |
|                        | R455P           | 458             | PKC                      |
|                        | R482L           | 480             | PKC                      |
|                        | R482Q           | 480             | PKC                      |
|                        | R482W           | 480             | PKC                      |
|                        | R541C           | 546             | (Akt)                    |
|                        | R545C           | 548             | (CHEK1/2, Akt)           |
|                        | R527C           | (525, 533, 534) | PKC                      |
|                        | R527H           | (525, 533, 534) | PKC                      |
| R527L                  | (525, 533, 534) | PKC             |                          |
| R527P                  | (525, 533, 534) | PKC             |                          |

**Supplemental Table 3.** A list of putative kinase P-sites that were predicted to be gained or lost by both computational tools, sorted by phosphorylation site.

**A**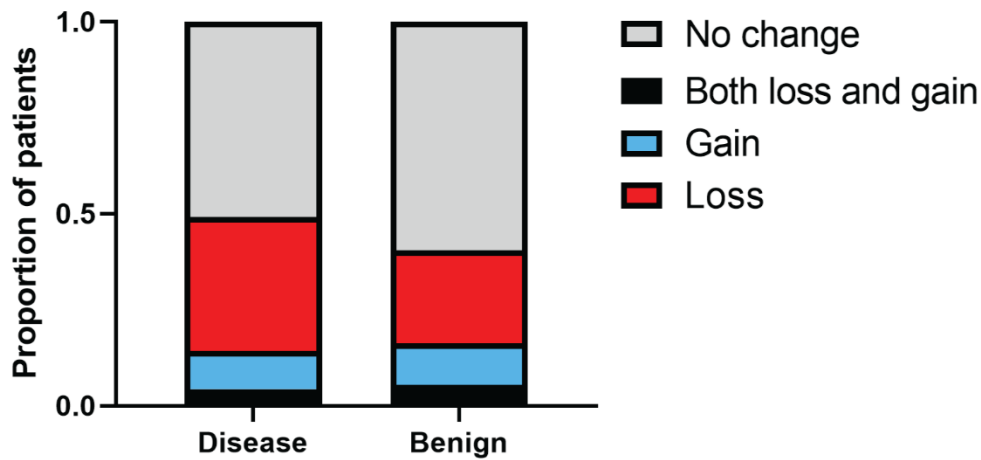**B**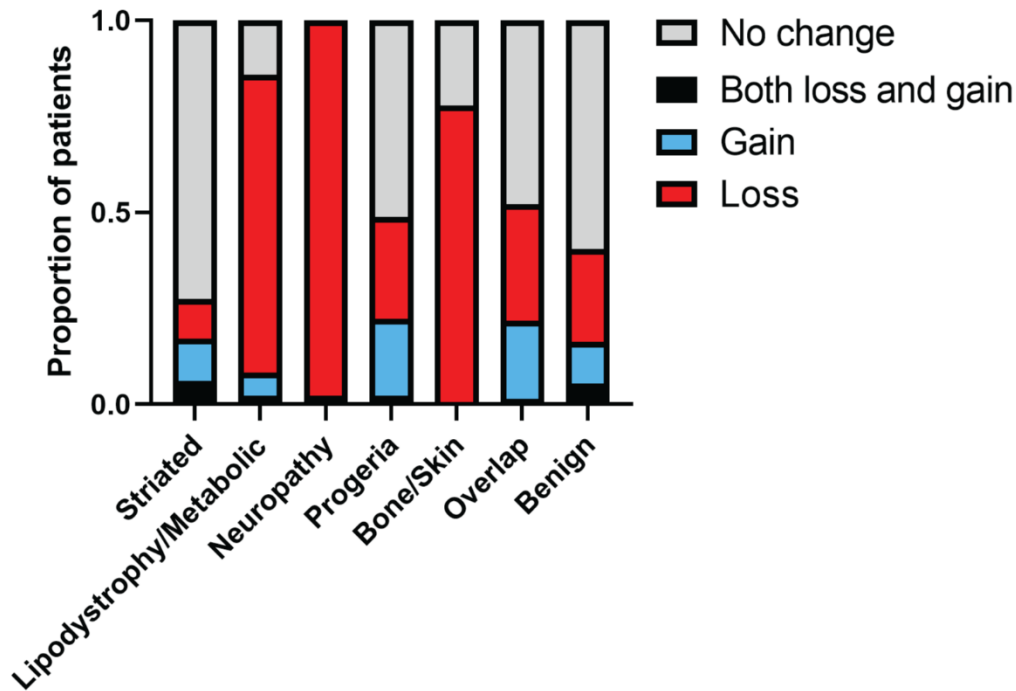

**Supplemental Figure 3. Predicted phosphorylation changes by disease status and phenotype.** A) Predicted phosphorylation in disease vs. benign groups: the proportion of patients with variants associated with disease or not predicted to result in loss, gain, both, or no change in phosphorylation. B) Predicted phosphorylation changes by phenotype: the proportion of patients by phenotype with variants predicted to result in loss, gain, both, or no change in phosphorylation.

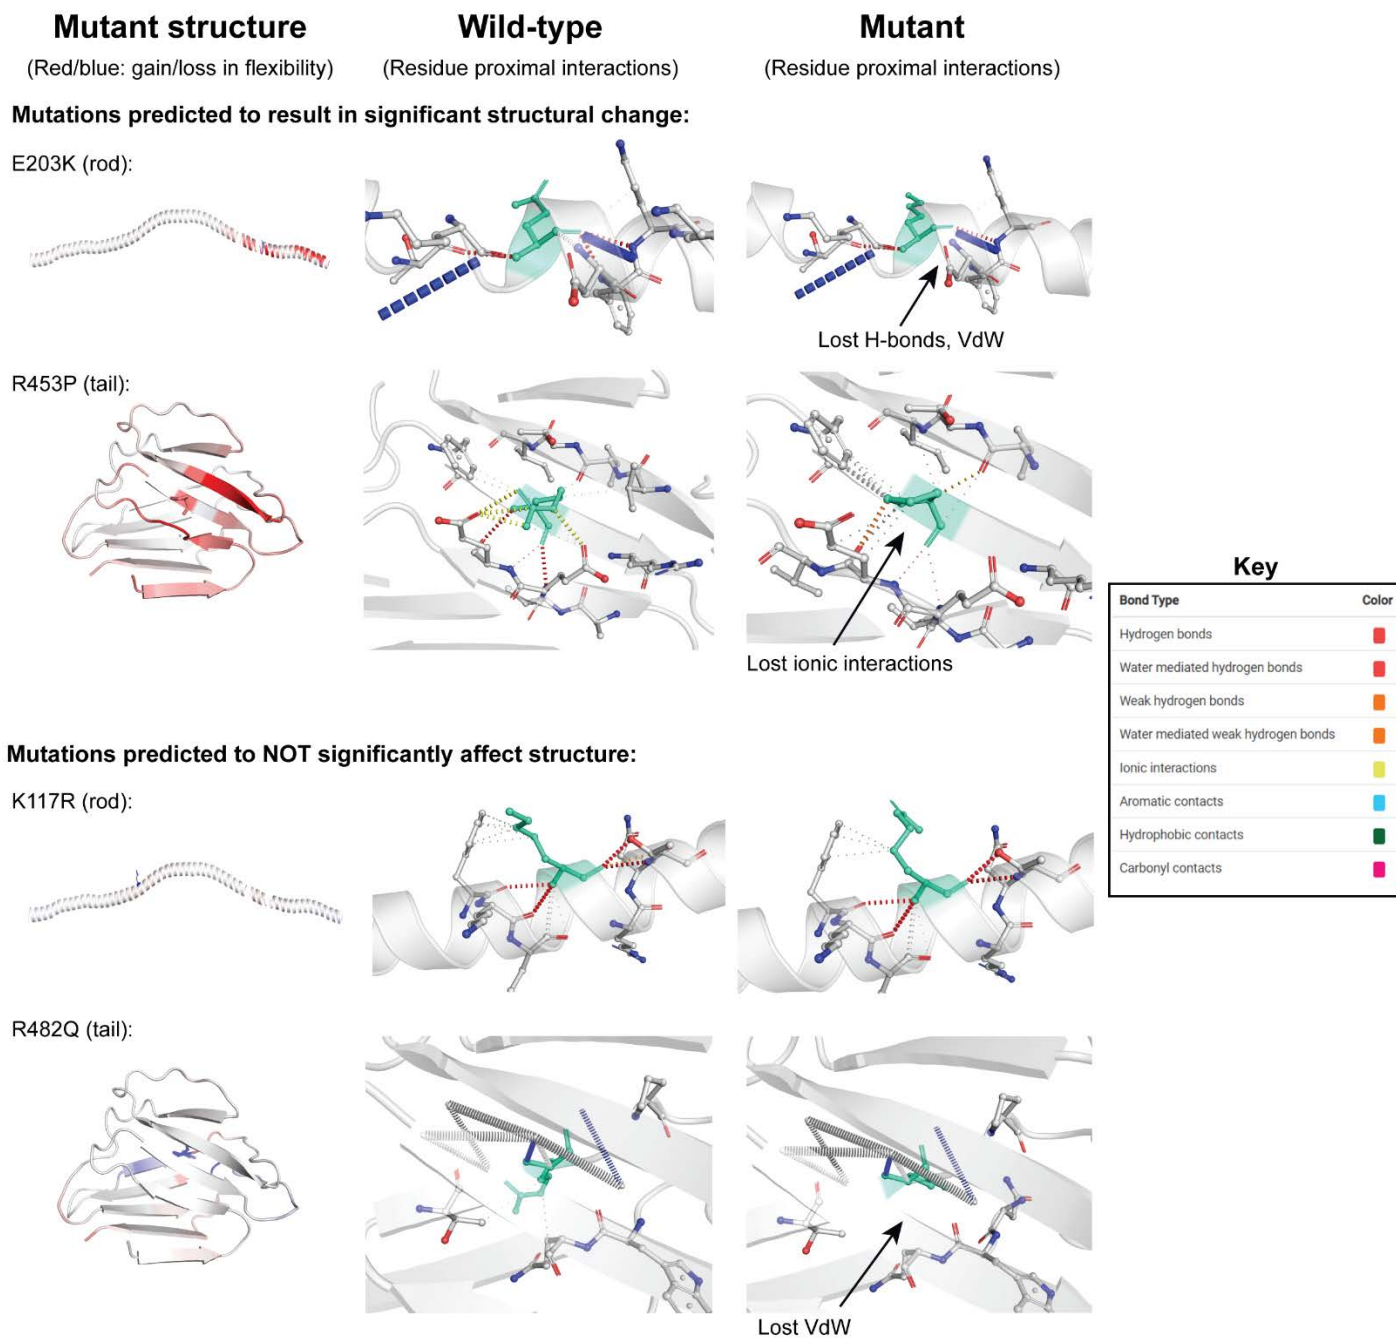

**Supplemental Figure 4. Example verification of predicted structural changes.** Modeling of point mutations and visualization performed using DynaMut (see Methods). Depicted are two example hotspot missense mutations from both rod (PDB: 6JLB chain A, residues 46-247) and tail (PDB: 1IFR, residues 432-544) domains, either predicted to undergo significant structural change or be structurally preserved. From left to right: 1) global structure depicted in the form of coiled domain or globular domain, with red indicated increased flexibility in the protein induced by the mutation; 2) Cartoon of wild-type residue (in mint green) and neighboring interactions, color coded based on key; 3) Cartoon of mutant residue (in mint green) and neighboring interactions, with lost interactions from mutations labeled by arrow(s). Interactions are largely preserved in the bottom half panel, with only relatively minor interactions lost, if any. VdW, Van der Waals.

**Supplemental Table 1.** Compiled mutational (cDNA variant, amino acid change, exon, domain, mutation type) and clinical data (phenotype, heterozygosity status, sex, and geographic origin) from all sources in this study (Human Intermediate Filament Database, Universal Mutation Database, UniProt, and literature review), comprising 1890 individuals and 404 unique mutations. Possible post-translational modification associated with each residue, according to UniProt, are also included.
